# Supplementary material for: Visible-light-controlled homo- and copolymerization of styrenes by a bichromophoric Ir–Pd catalyst
Source: Royal Society of Chemistry journal article supplement (doi:10.1039/c5cc00611b), 2015-01-01
Supplement: c5cc00611b1.pdf [file c5cc00611b1.pdf]

## Electronic Supporting Information

# Visible-Light-Controlled Homo- and Copolymerization of Styrenes by Bichromophoric Ir-Pd Catalyst

Kei Murata,<sup>1</sup> Kazuma Saito,<sup>1</sup> Shinnosuke Kikuchi,<sup>2</sup>  
Munetaka Akita\*<sup>1</sup>, Akiko Inagaki\*<sup>2</sup>

<sup>1</sup>Chemical Resources Laboratory, Tokyo Institute of Technology, R1-27, 4259 Nagatsuta Midori-ku Yokohama 226-8503

<sup>2</sup>Department of Chemistry, Graduate School of Science and Engineering, Tokyo Metropolitan University, Minami-Osawa 1-1, Hachioji, Tokyo, 192-0397

| Contents                                                                                                                                  | Figure     | Page |
|-------------------------------------------------------------------------------------------------------------------------------------------|------------|------|
| General Procedures                                                                                                                        |            | S2   |
| Preparation of 3-(2-naphthyl)-2-pyridyl benzene                                                                                           |            | S2   |
| Preparation of [Ir(ppy <sup>naph</sup> ) <sub>2</sub> (bpm <sup>Br</sup> )PdMe(MeCO)](BF <sub>4</sub> ) <sub>2</sub> ( <b>1</b> )         |            | S3   |
| Photochemical Reaction                                                                                                                    |            | S5   |
| UV-vis absorption spectrum of <b>1</b> and <b>2</b>                                                                                       | Figure S1  | S5   |
| Catalytic reactions of styrene under ON - OFF switching condition                                                                         | Figure S2  | S6   |
| <i>M<sub>w</sub></i> and <i>M<sub>w</sub>/M<sub>n</sub></i> plotted against conversion during photocatalytic reactions of 4-fluorostyrene | Figure S3  | S6   |
| Copolymerization of Styrene and TFEVE by <b>1</b> under irradiation                                                                       | Figure S4  | S7   |
| Copolymerization of Styrene and TFEVE by <b>1</b> under OFF → ON irradiation                                                              | Figure S5  | S7   |
| <sup>1</sup> H, <sup>13</sup> C, NMR spectra of TFEVE / styrene copolymer                                                                 | Figure S6  | S8   |
| Comparison of <sup>1</sup> H NMR spectra of copolymer with styrene and TFEVE homopolymers                                                 | Figure S7  | S9   |
| MALDI-TOF-MS spectra of TFEVE / styrene copolymer                                                                                         | Figure S8  | S10  |
| GPC chart of TFEVE / styrene copolymer                                                                                                    | Figure S9  | S11  |
| DSC curves of the TFEVE / styrene copolymer                                                                                               | Figure S10 | S12  |
| <sup>1</sup> H, <sup>13</sup> C, DOSY NMR spectra of TFEVE / styrene copolymer                                                            | Figure S11 | S13  |
| ESI-MS spectra of the reaction mixture of the catalytic copolymerization with TFEVE and styrene                                           | Figure S12 | S13  |
| Consumption rate of TFEVE under dark or irradiated condition                                                                              | Figure S13 | S14  |
| <sup>1</sup> H NMR spectra during photopolymerization of styrene by <b>1</b>                                                              | Figure S14 | S15  |

## Electronic Supporting Information

### Experimental Details and Spectral Data

#### General Procedures.

Standard Schlenk and vacuum line techniques under a nitrogen atmosphere were employed for the reactions. Dichloromethane ( $\text{CaH}_2$ ) and Acetone ( $\text{K}_2\text{CO}_3$ ) were treated with appropriate drying agents and distilled. MeOH and EtOH were dehydrated by Mg with  $\text{I}_2$ , and distilled. 5,5'-dibromo-2,2'-bipyrimidine ( $\text{bpm}^{\text{Br}}$ ) and  $[\text{Pd}(\text{cod})\text{MeCl}]$  were prepared according to the published procedures [ref]. Other chemicals were purchased and used as received.  $^1\text{H}$  and  $^{13}\text{C}$  NMR spectra were recorded on JEOL-JMN-LA500, JEOL-JMS-ECS400, and Bruker AVANCE-400 spectrometers. ESI-MS spectra were recorded on a ThermoQuest Finnigan LCQ Duo mass spectrometer. UV-vis spectra were obtained by a JASCO V-670 spectrometer.

#### Preparation of 2-[3-(2-naphthyl)phenyl]pyridine ( $\text{ppy}^{\text{naph}}$ ).

3-(2-Naphthyl)phenylboronic acid (1.20 g, 0.00484 mol),  $\text{Na}_2\text{CO}_3$  (2.89 g, 0.0272 mol) and  $\text{Pd}(\text{PPh}_3)_4$  (132 mg, 0.000114 mol) were dissolved with toluene (20 mL), EtOH (20 mL) and  $\text{H}_2\text{O}$  (4 mL) in a 200 mL 2-necked flask. Then 2-bromopyridine (0.352 mL, 0.00369 mol) was added and refluxed for 12 h under  $\text{N}_2$ . The reaction mixture was extracted with  $\text{CH}_2\text{Cl}_2$  (3 times), washed with brine (3 times), and the collected organic layer was dried over  $\text{MgSO}_4$ . After removal of the solvent, the crude product was purified by silica-gel column chromatography ( $\text{CH}_2\text{Cl}_2$  / hexane = 1 / 1) to yield the target compound as a pale yellow oil (0.570 g, 0.00203 mol, 41.9%).  $^1\text{H}$  NMR (400 MHz, r.t.,  $\text{CDCl}_3$ ,  $\delta$  / ppm) :  $\delta$  8.79 (d, 1 H,  $J$  = 4.8 Hz, H5), 8.43 (s, 1 H, H7), 8.17 (s, 1 H, H13), 8.02 (d, 1 H,  $J$  = 7.6 Hz, H11), 7.97 – 7.79 (m, 6 H, H2, H9, *naphthyl*), 7.77 (dd, 1 H,  $J$  = 7.2 Hz, 7.2 Hz, H3), 7.61 (dd, 1 H,  $J$  = 7.6 Hz, 7.6 Hz, H10), 7.55 – 7.51 (m, 2 H, *naphthyl*), 7.26 (dd, 1 H,  $J$  = 7.2 Hz, 4.8 Hz, H4).  $^{13}\text{C}$  NMR (133 MHz, r.t.,  $\text{CDCl}_3$ ,  $\delta$  / ppm) :  $\delta$  157.4 (s, C1), 149.8 (d,  $J_{\text{CH}}$  = 180.3 Hz, C5), 141.7 (s, C8), 140.1 (s, C6), 138.4 (s, C12), 136.9 (d,  $J_{\text{CH}}$  = 161.5 Hz, C3), 133.8 (s, *naphthyl*), 132.8 (s, *naphthyl*), 129.4 (d,  $J_{\text{CH}}$  = 160.6 Hz, C10), 128.5 (d,  $J_{\text{CH}}$  = 158.9 Hz, *naphthyl*), 128.3 (d,  $J_{\text{CH}}$  = 157.0 Hz, *naphthyl*), 128.1 (d,  $J_{\text{CH}}$  = 159.7 Hz, *naphthyl*), 127.7 (d,  $J_{\text{CH}}$  = 165.1 Hz, C9), 126.4 (d,  $J_{\text{CH}}$  = 158.7 Hz, *naphthyl*), 126.1 (d,  $J_{\text{CH}}$  = 157.5 Hz, C7), 126.1 (d,  $J_{\text{CH}}$  = 157.5 Hz, C13 or *naphthyl*), 126.0 (d,  $J_{\text{CH}}$  = 157.5 Hz, C11 or C13 or *naphthyl*), 126.0 (d,  $J_{\text{CH}}$  = 157.5 Hz, C11 or *naphthyl*), 125.7 (d,  $J_{\text{CH}}$  = 158.3 Hz, *naphthyl*), 122.3 (d,  $J_{\text{CH}}$  = 158.4 Hz, C4), 120.8 (d,  $J_{\text{CH}}$  = 153.9 Hz, C2). EI-MS:  $m/z$  = 281  $[\text{M}]^+$ . HR-MS (EI):  $m/z$  = 281.1210 (calcd for  $[\text{C}_{21}\text{H}_{15}\text{N}]^+$ : 281.1204).

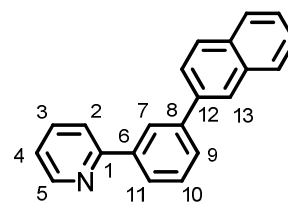

## Electronic Supporting Information

### Preparation of $[\text{Ir}(\text{ppy}^{\text{naph}})_2(\text{bpm}^{\text{Br}})\text{PdMe}(\text{Me}_2\text{CO})](\text{BF}_4)_2$ (1).

$[\text{Ir}(\text{ppy}^{\text{naph}})(\text{bpm}^{\text{Br}})](\text{BF}_4)$  was prepared in a similar fashion to the published procedure for the synthesis of  $[\text{Ir}(\text{C}^{\wedge}\text{N})_2(\text{N}^{\wedge}\text{N})]^+$ .<sup>[1]</sup>

$\text{IrCl}_3 \cdot 3\text{H}_2\text{O}$  (0.357 g, 1.01 mmol) and 3-(2-naphthyl)-2-pyridyl benzene (0.570 g, 2.03 mmol) were dissolved in 2-ethoxyethanol (15 mL) and  $\text{H}_2\text{O}$  (5 mL), and refluxed under  $\text{N}_2$  for 24 h. The precipitate was filtered, washed with  $\text{H}_2\text{O}$  and EtOH, and then dried up to afford  $[\text{Ir}(\text{ppy}^{\text{naph}})_2\text{Cl}]_2$  as a

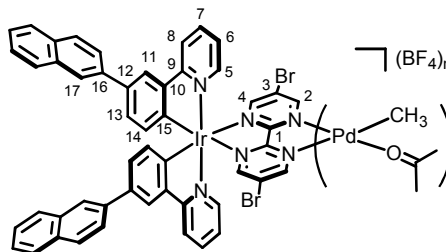

yellow solid (0.732 g, 0.464 mmol, 91.9%).  $^1\text{H}$  NMR (400 MHz, r.t.,  $\text{CDCl}_3$ ,  $\delta$  / ppm) :  $\delta$  9.39 (d,  $J = 5.2$  Hz, 4 H, H5), 8.08 (d,  $J = 8.0$  Hz, 4 H, H8), 7.89 – 7.78 (m, 24 H, H7, H11, H17, *naphthyl*), 7.62 (dd,  $J = 8.4$  Hz, 2.0 Hz, 4 H, *naphthyl*), 7.45 – 7.38 (m, 8 H, *naphthyl*), 7.99 (d,  $J = 8.0$  Hz, 4 H, H13), 7.90 (dd,  $J = 6.0$  Hz, 5.2 Hz, 4 H, H6), 6.16 (d,  $J = 8.0$  Hz, 4 H, H14).

$[\text{Ir}(\text{ppy}^{\text{naph}})_2\text{Cl}]_2$  (0.409 g, 0.259 mmol) and 5,5'-dibromo-2,2'-bipyrimidine (0.196 g, 0.620 mmol) were dissolved in  $\text{CH}_2\text{Cl}_2$  (20 mL) and MeOH (10 mL), and refluxed under  $\text{N}_2$  for 5 h. The mixture was concentrated under vacuum and stirred with an excess amount of  $\text{NH}_4\text{BF}_4$  at ambient temperature for 5 h. The precipitate was filtered and washed with EtOH, water, and  $\text{Et}_2\text{O}$ . The resulting solid was purified by column chromatography packed with neutral aluminum oxide ( $\text{CH}_2\text{Cl}_2$  / hexane = 3 : 1). The eluted pale orange band was collected and dried up under vacuum. The obtained solid was dissolved in  $\text{CH}_2\text{Cl}_2$  and a slow diffusion of hexane yielded  $[\text{Ir}(\text{ppy}^{\text{naph}})_2(\text{bpm}^{\text{Br}})](\text{BF}_4)$  as a dark-red solid (0.238 g, 0.206 mmol, 79.5%).  $^1\text{H}$  NMR (400 MHz,  $\text{CD}_3\text{CN}$ , r.t.,  $\delta$  / ppm) :  $\delta$  9.27 (d,  $J = 2.8$  Hz, 2 H, H2), 8.61 (d,  $J = 2.4$  Hz, 2 H, H4), 8.31 (d,  $J = 8.0$  Hz, 2 H, H8), 8.27 (d,  $J = 1.6$  Hz, 2 H, H11), 8.11 (s, 2 H, H17), 8.01 – 7.85 (m, 12 H, H5, H7, *naphthyl*), 7.79 (dd,  $J = 8.8$  Hz, 2.0 Hz, 2 H, *naphthyl*), 7.52 – 7.46 (m, 4 H, *naphthyl*), 7.36 (dd,  $J = 8.0$  Hz, 1.6 Hz, 1 H, H13), 7.18 (dd,  $J = 7.6$  Hz, 6.0 Hz, 1 H, H6), 6.51 (d,  $J = 8.0$  Hz, 1 H, H14).  $^{13}\text{C}$  NMR (100 MHz,  $\text{CD}_3\text{CN}$ , r.t.,  $\delta$  / ppm) :  $\delta$  162.8 (s, C1), 156.6 (d,  $J_{\text{CH}} = 192.2$  Hz, C2), 156.0 (s, C9), 154.4 (d,  $J_{\text{CH}} = 198.3$  Hz, C4), 145.9 (d,  $J_{\text{CH}} = 183.1$  Hz, C5), 142.1 (s, C15), 141.0 (s, C10), 135.1 (d,  $J_{\text{CH}} = 159.9$  Hz, C7), 134.0 (s, C12), 131.9 (s, C16), 129.7 (s, *naphthyl*), 128.4 (s, *naphthyl*), 128.2 (d,  $J_{\text{CH}} = 157.6$  Hz, C14), 125.2 (d,  $J_{\text{CH}} = 170.1$  Hz, C13), 124.3 (d,  $J_{\text{CH}} = 163.2$  Hz, *naphthyl*), 123.9 (d,  $J_{\text{CH}} = 160.5$  Hz, *naphthyl*), 123.4 (d,  $J_{\text{CH}} = 157.8$  Hz, *naphthyl*), 122.3 (d,  $J_{\text{CH}} = 159.2$  Hz, *naphthyl*), 121.8 (d,  $J_{\text{CH}} = 167.9$  Hz, *naphthyl*), 120.9 (d,  $J_{\text{CH}} = 151.7$  Hz, *naphthyl*), 120.6 (d,  $J_{\text{CH}} = 169.1$  Hz, C17), 120.4 (s, C3), 119.9 (d,  $J_{\text{CH}} = 161.6$  Hz, C6), 119.4 (d,  $J_{\text{CH}} = 162.9$  Hz, C11), 116.3 (d,  $J_{\text{CH}} = 165.5$  Hz, C8). ESI-MS ( $\text{CH}_3\text{CN}$ ) :  $m/z = 1069$   $[\text{M} - \text{BF}_4]^+$ . Anal. Found (calcd for  $\text{C}_{50}\text{H}_{32}\text{BBr}_2\text{F}_4\text{IrN}_6 + (2 \text{ H}_2\text{O})$ ): C, 50.04 (50.39); H, 3.02 (3.04); N, 6.87 (7.05).

## Electronic Supporting Information

Palladation of  $[\text{Ir}(\text{ppy}^{\text{naph}})(\text{bpm}^{\text{Br}})](\text{BF}_4)$  was implemented in a similar fashion to the published procedure for the synthesis of the Ru-Pd complex.<sup>[2]</sup>

$[\text{Ir}(\text{ppy}^{\text{naph}})_2(\text{bpm}^{\text{Br}})](\text{BF}_4)$  (188 mg, 0.163 mmol) and  $[\text{PdMeCl}(\text{cod})]$  (47.4 mg, 0.179 mmol) was dissolved in  $\text{CH}_2\text{Cl}_2$  (8 mL) and stirred at ambient temperature for 3 h. The solvent was removed under reduced pressure and the resulting solid was precipitated with  $\text{CH}_2\text{Cl}_2$  -  $\text{Et}_2\text{O}$ , which yielded  $[\text{Ir}(\text{Ph}^{\text{naph}}\text{py})_2(\text{bpm}^{\text{Br}})\text{PdMeCl}](\text{BF}_4)_2$  as a brownish-red solid (201 mg, 0.153 mmol, 93.9%).  $^1\text{H}$  NMR (400 MHz, r.t.,  $\text{CD}_3\text{NO}_2$ ,  $\delta$  / ppm) :  $\delta$  9.29 (br, 2 H, H2), 8.78 (br, 2 H, H4), 8.35 (d,  $J$  = 8.0 Hz, 2 H, H8), 8.15 (d,  $J$  = 2.0 Hz, 2 H, H11), 8.11 (s, 2 H, H17), 8.05 – 7.86 (m, 10 H, H5, H7, *naphthyl*), 7.83 (dd,  $J$  = 8.8 Hz, 2.0 Hz, 2 H, *naphthyl*), 7.53 – 7.46 (m, 4 H, *naphthyl*), 7.42 (dd,  $J$  = 8.0 Hz, 2.0 Hz, 2 H, H13), 7.21 (dd,  $J$  = 7.6 Hz, 6.0 Hz, 2 H, H6), 6.49 (d,  $J$  = 8.0 Hz, 2 H, H14), 1.17 (s, 3 H,  $\text{Pd-CH}_3$ ). ESI-MS (acetone) :  $m/z$  = 1225  $[\text{M} - \text{BF}_4]^+$ .

$[\text{Ir}(\text{Ph}^{\text{naph}}\text{py})_2(\text{bpm}^{\text{Br}})\text{PdMeCl}](\text{BF}_4)_2$  (194 mg, 0.148 mmol) was dissolved in acetone (8 mL) and acetone (4 mL) solution of  $\text{AgBF}_4$  (28.8 mg, 0.148 mmol) was added. The mixture was stirred at ambient temperature for 1 h. The resulting solution was filtered through Celite and the filtrate was concentrated under vacuum. Then a slow addition of  $\text{Et}_2\text{O}$  gave the target compound **1** as a brownish-red solid (202 mg, 0.142 mmol, 96.0%).  $^1\text{H}$  NMR (400 MHz,  $\text{CD}_3\text{CN}$ , r.t.,  $\delta$  / ppm) :  $\delta$  9.28 (br, 2 H, H2), 8.30 (br, 2 H, H4), 8.29 (d,  $J$  = 8.0 Hz, 2 H, H8), 8.23 (d,  $J$  = 2.0 Hz, 2 H, H11), 8.13 (s, 2 H, H17), 8.00 (ddd,  $J$  = 8.0 Hz, 6.4 Hz, 1.2 Hz, 2 H, H7), 7.92 – 7.84 (m, 10 H, H5, *naphthyl*), 7.79 (dd,  $J$  = 8.8 Hz, 1.6 Hz, 2 H, *naphthyl*), 7.52 – 7.45 (m, 4 H, *naphthyl*), 7.33 (dd,  $J$  = 7.6 Hz, 2.0 Hz, 2 H, H13), 7.21 (dd,  $J$  = 6.4 Hz, 6.0 Hz, 2 H, H6), 6.38 (dd,  $J$  = 7.6, 2.8 Hz, 2 H, H14), 1.07 (br, 3 H,  $\text{Pd-CH}_3$ ).  $^{13}\text{C}$  NMR (100 MHz,  $\text{CD}_3\text{CN}$ , r.t.,  $\delta$  / ppm) :  $\delta$  167.7 (s, C1), 161.6 (d,  $J_{\text{CH}}$  = 189.8 Hz, C2), 160.9 (s, C9), 159.4 (d,  $J_{\text{CH}}$  = 200.4 Hz, C4), 151.6 (d,  $J_{\text{CH}}$  = 183.8 Hz, C5), 146.9 (s, C15), 146.0 (s, C10), 140.2 (d,  $J_{\text{CH}}$  = 165.7 Hz, C7), 139.0 (s, C12), 137.0 (s, C16), 134.8 (s, *naphthyl*), 133.5 (s, *naphthyl*), 133.2 (d,  $J_{\text{CH}}$  = 157.7 Hz, C14), 130.3 (d,  $J_{\text{CH}}$  = 158.7 Hz, C13), 129.4 (d,  $J_{\text{CH}}$  = 159.4 Hz, *naphthyl*), 129.0 (d,  $J_{\text{CH}}$  = 158.3 Hz, *naphthyl*), 128.5 (d,  $J_{\text{CH}}$  = 160.2 Hz, *naphthyl*), 127.4 (d,  $J_{\text{CH}}$  = 153.7 Hz, *naphthyl*), 126.9 (d,  $J_{\text{CH}}$  = 164.8 Hz, *naphthyl*), 126.1 (d,  $J_{\text{CH}}$  = 156.5 Hz, *naphthyl*), 125.9 (d,  $J_{\text{CH}}$  = 156.8 Hz, C17), 125.9 (s, C3), 125.1 (d,  $J_{\text{CH}}$  = 169.1 Hz, C6), 124.6 (d,  $J_{\text{CH}}$  = 148.8 Hz, C11), 121.6 (d,  $J_{\text{CH}}$  = 168.8 Hz, C8), -3.13 (br,  $\text{Pd-CH}_3$ ). The proton and carbon signals of a coordinating solvent were each overlapped with the residual proton signals and the carbon signals of  $\text{CD}_3\text{CN}$ , respectively. Anal. Found (calcd for  $\text{C}_{53}\text{H}_{38}\text{B}_2\text{Br}_2\text{F}_4\text{IrN}_7\text{Pd} + (2 \text{ H}_2\text{O})$ ): C, 44.31 (44.18); H, 3.27 (2.94); N, 6.67 (6.80).



## Electronic Supporting Information

### Photochemical Reaction.

A  $\text{CD}_3\text{NO}_2$  solution (0.4 mL) of styrene (0.5 mol/l) with a catalytic amount of the catalyst **1** (2 mol%) was prepared in a 5  $\phi$  NMR glass tube under nitrogen atmosphere. For visible-light irradiation, the tube was put in a water bath (25  $^\circ\text{C}$ ) and placed at a distance of 70 mm from a light source (150 W Xe lamp with a L42 cut-off filter ( $\lambda_{\text{irr.}} > 420 \text{ nm}$ )). For the dark condition, the tube was foiled with an aluminum sheet and placed in a water bath (25  $^\circ\text{C}$  / 60  $^\circ\text{C}$ ). Reactions were followed by  $^1\text{H}$  NMR spectroscopy after appropriate time intervals.

For copolymerization of styrene and 2,2,2-trifluoroethyl vinyl ether, a  $\text{CD}_3\text{NO}_2$  solution (0.4 mL) of both substrates (50 equiv/cat, each) with a catalytic amount of the Ir-Pd complex (1 mol%) was prepared, then irradiated or kept dark, under the same condition.

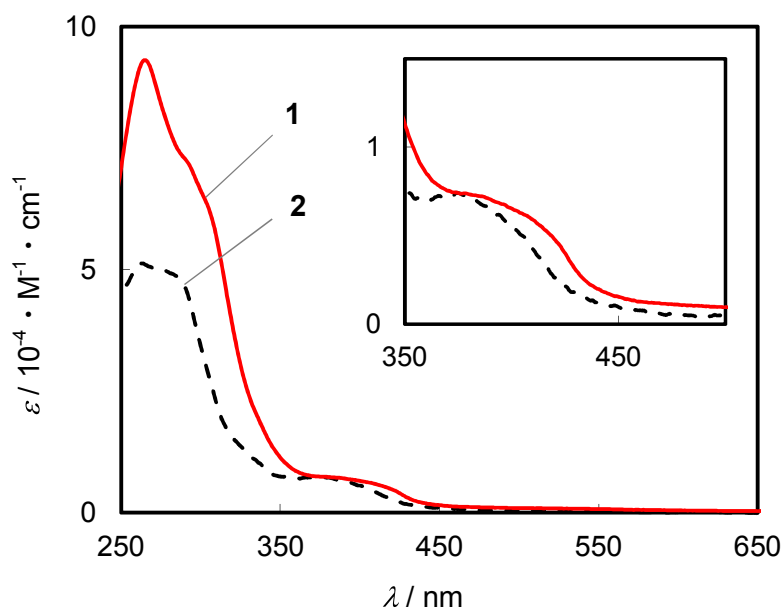

**Figure S1.** UV-vis absorption spectrum of **1** (solid line) and **2** (dashed line) in deaerated  $\text{CH}_3\text{CN}$  (r.t.)

## Electronic Supporting Information

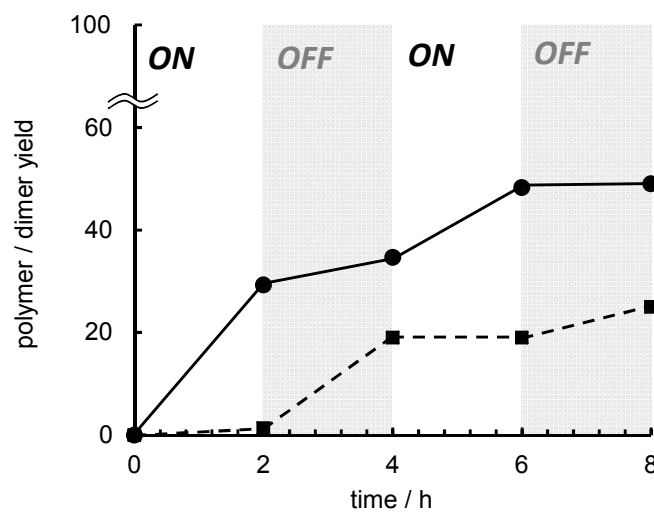

**Figure S2.** UV-vis absorption spectrum of **1** (solid line) and **2** (dashed line) in deaerated CH<sub>3</sub>CN (r.t.)

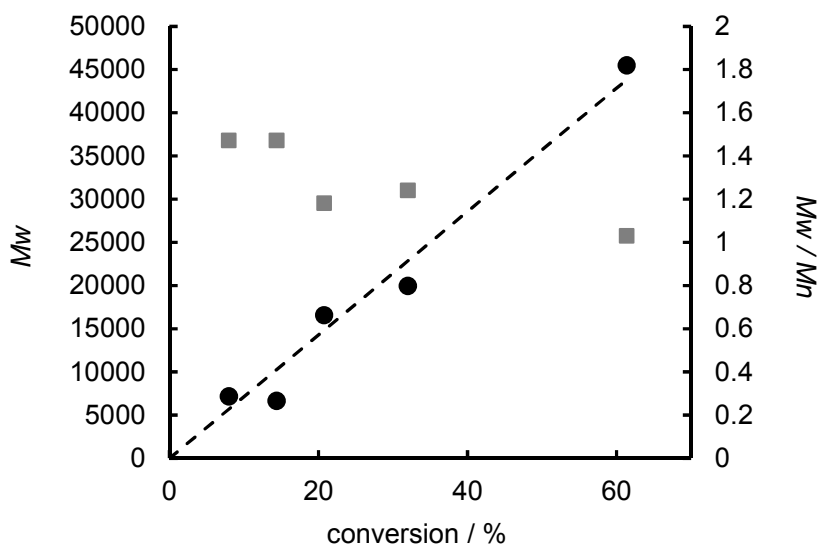

**Figure S3.** Molecular weight ( $M_w$ , circle) and molecular weight distribution ( $M_w/M_n$ , square) plotted against conversion during photocatalytic reactions of 4-fluorostyrene ( $\lambda_{\text{irr}} > 420$  nm, cat. 2 mol%, CD<sub>3</sub>NO<sub>2</sub>, r.t.)

## Electronic Supporting Information

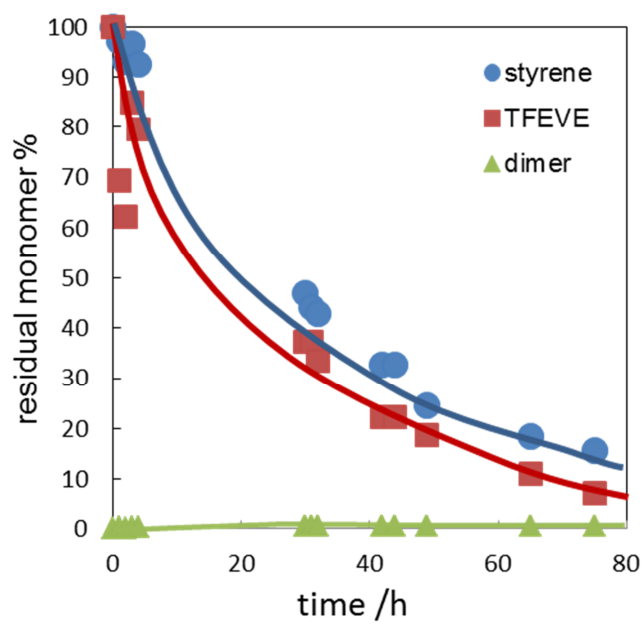

**Figure S4.** Copolymerization of Styrene and TFEVE by **1** under irradiation (ON)

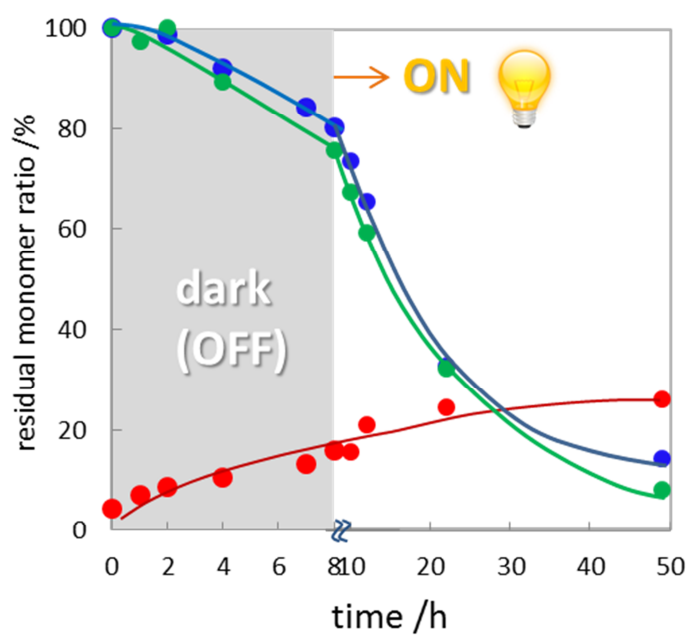

**Figure S5.** Copolymerization of Styrene and TFEVE by **1** under OFF → ON irradiation

## Electronic Supporting Information

a)  $^{13}\text{C}$  NMR spectra (100 MHz,  $\text{CD}_2\text{ClCD}_2\text{Cl}$ ,  $100^\circ\text{C}$ )

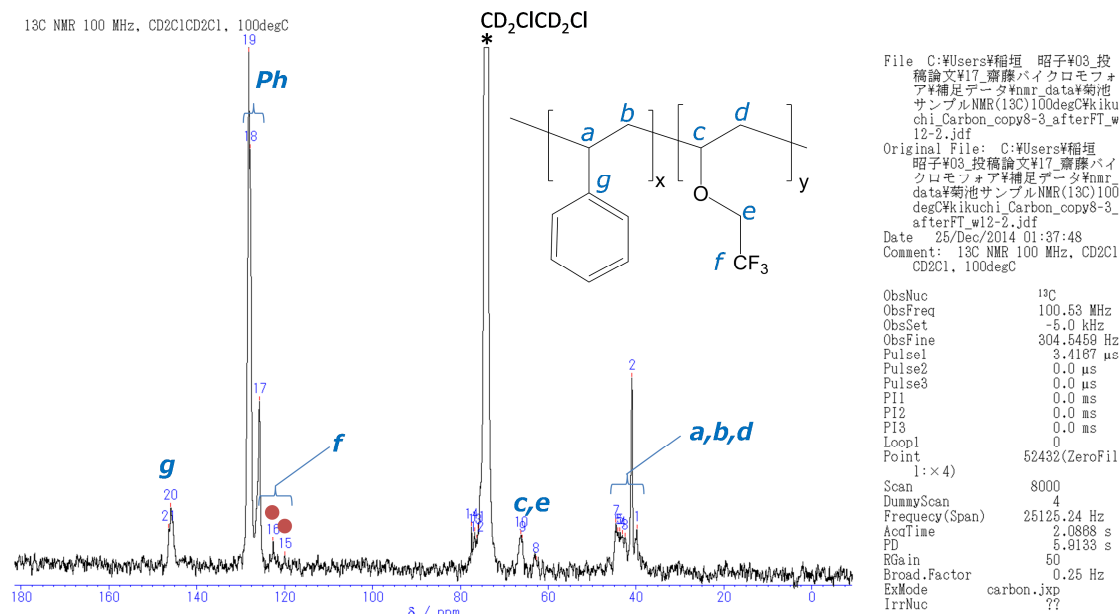b)  $^1\text{H}$  NMR spectra (100 MHz,  $\text{CD}_2\text{ClCD}_2\text{Cl}$ ,  $100^\circ\text{C}$ )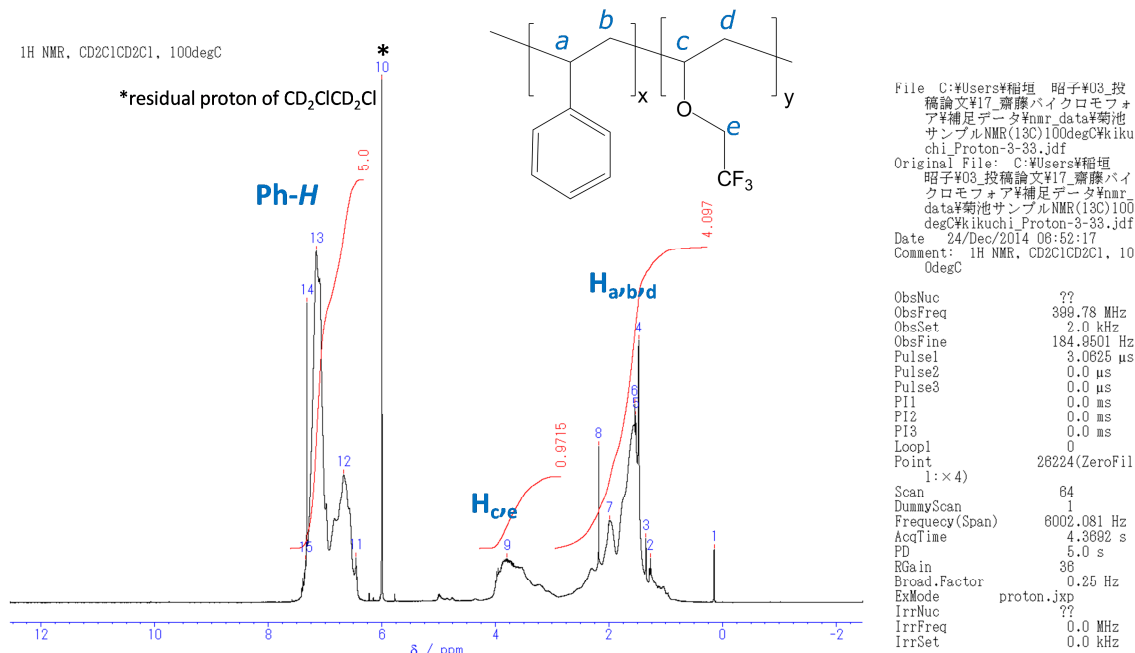

**Figure S6.**  $^1\text{H}$ ,  $^{13}\text{C}$ , NMR spectra of TFEVE / styrene copolymer ( $M_w = 5786$ ,  $M_n = 4209$ ,  $M_w/M_n = 1.37$ )

## Electronic Supporting Information

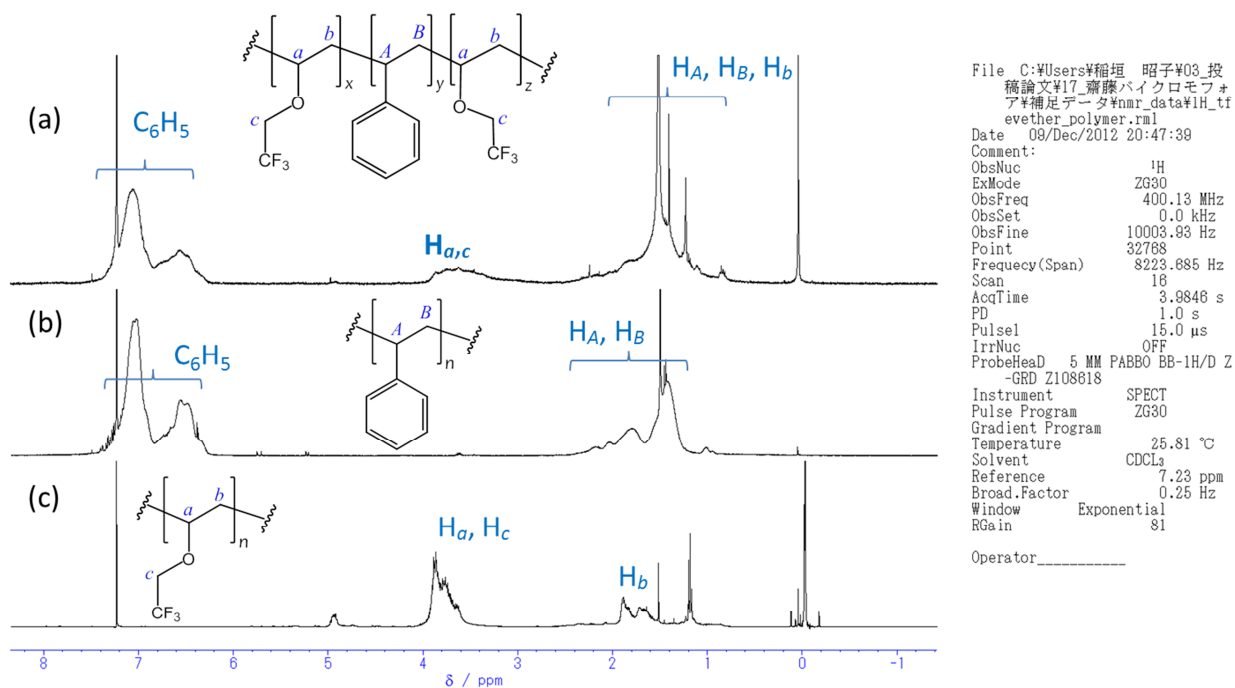

**Figure S7.** Comparison of  $^1\text{H}$  NMR spectra of copolymer with styrene and TFEVE homopolymers

## Electronic Supporting Information

(a)

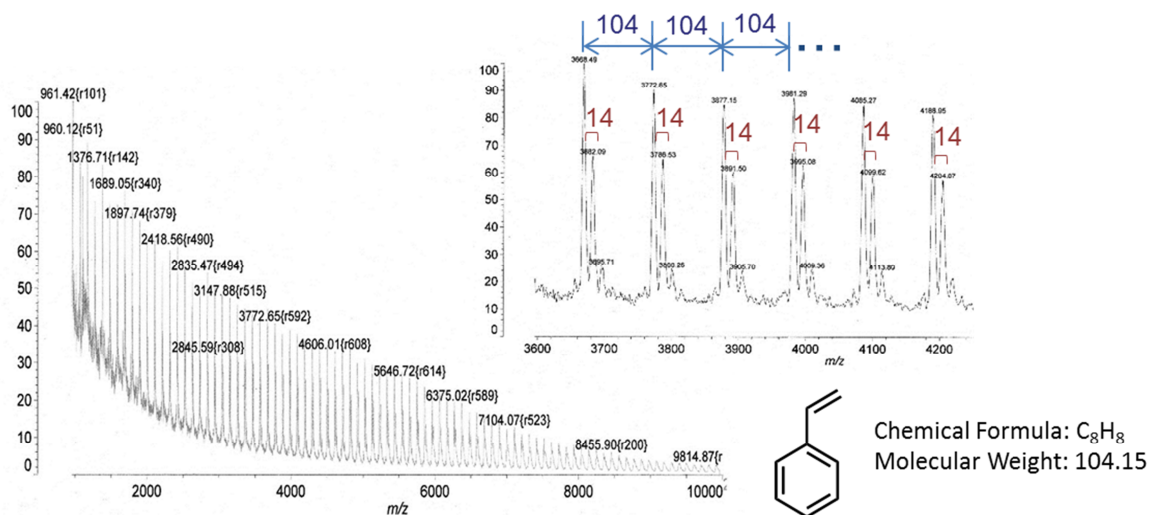

(b)

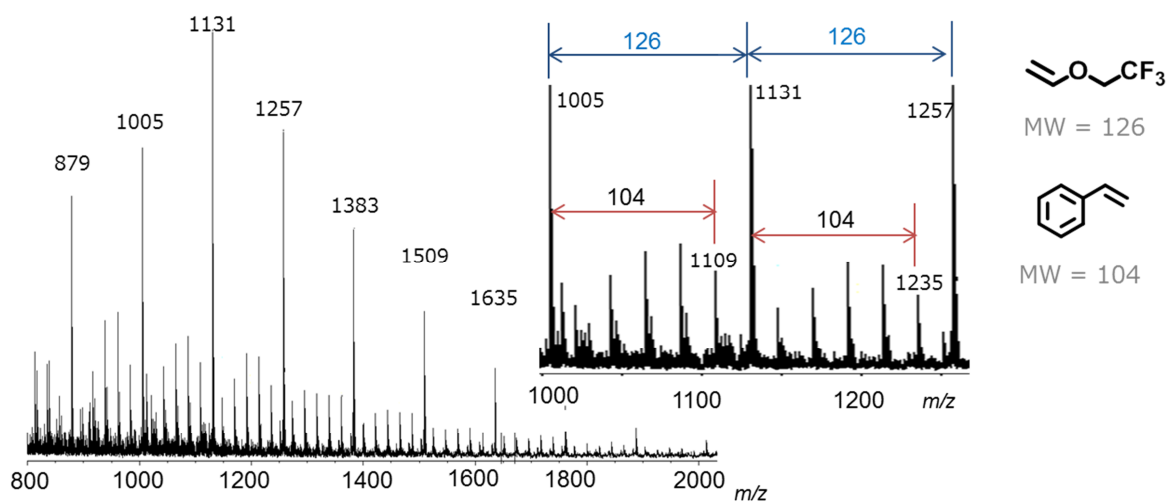

**Figure S8.** MALDI-TOF-MS spectra of (a) polystyrene catalyzed by **1** (2 mol%,  $CD_3NO_2$ , irradiated at  $\lambda > 420$  nm), (b) TFEVE / styrene copolymer catalyzed by **1** (1 mol%,  $CD_3NO_2$ , irradiated at  $\lambda > 420$  nm). Matrix: dithranol

## Electronic Supporting Information

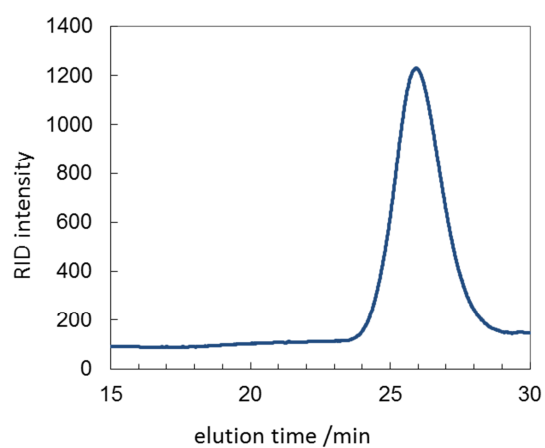

**Figure S9.** GPC chart of TFEVE / styrene copolymer ( $M_w = 5786$ ,  $M_n = 4209$ ,  $M_w/M_n = 1.37$ )

## Electronic Supporting Information

a) DSC curve of the TFEVE / styrene copolymer (Table 2, entry 1)

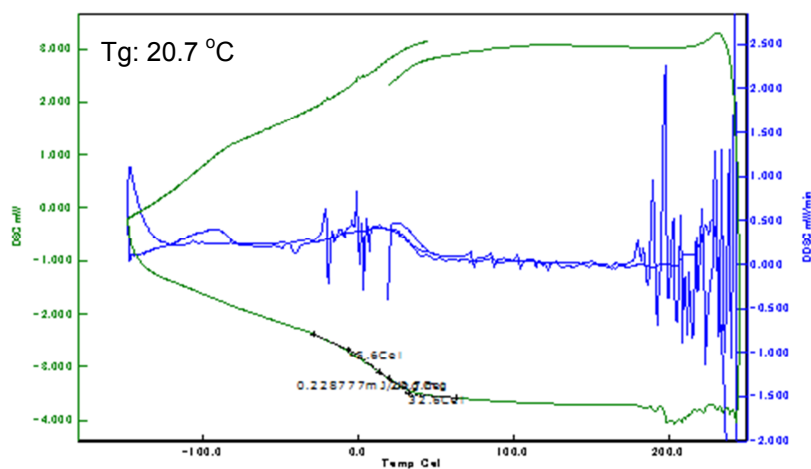

b) DSC curve of the TFEVE / styrene copolymer (Table 2, entry 2)

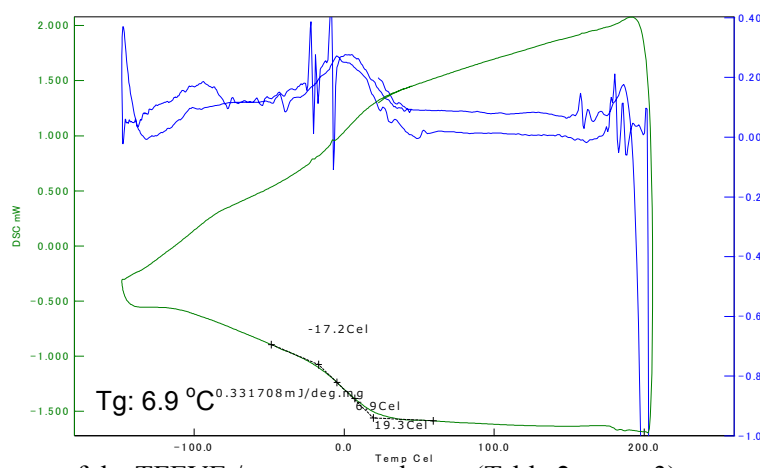

c) DSC curve of the TFEVE / styrene copolymer (Table 2, entry 3)

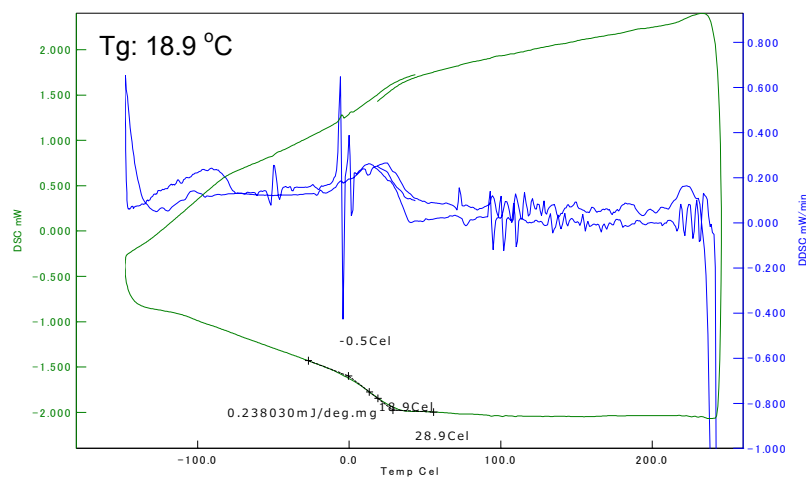

Figure S10. DSC curves of the TFEVE / styrene copolymer



## Electronic Supporting Information

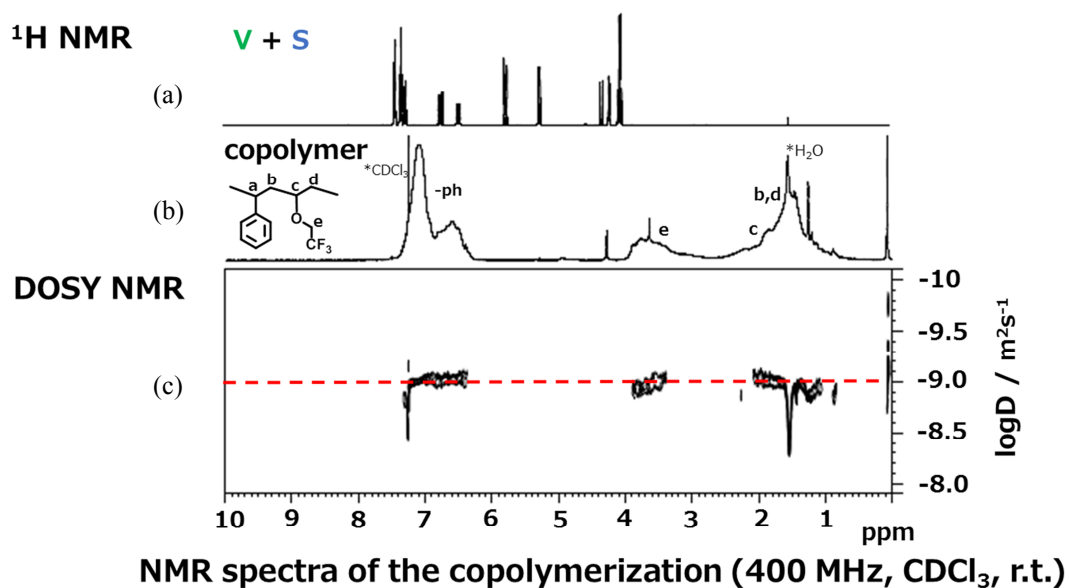

**Figure S11.**  $^1\text{H}$ ,  $^{13}\text{C}$ , DOSY NMR spectra of TFEVE / styrene copolymer

- (a)  $^1\text{H}$  NMR spectra of (a) 2,2,2-trifluoroethyl vinyl ether (V) and styrene (S),  
 (b) copolymer of V and S, (c) DOSY NMR spectrum of the V-S copolymer.

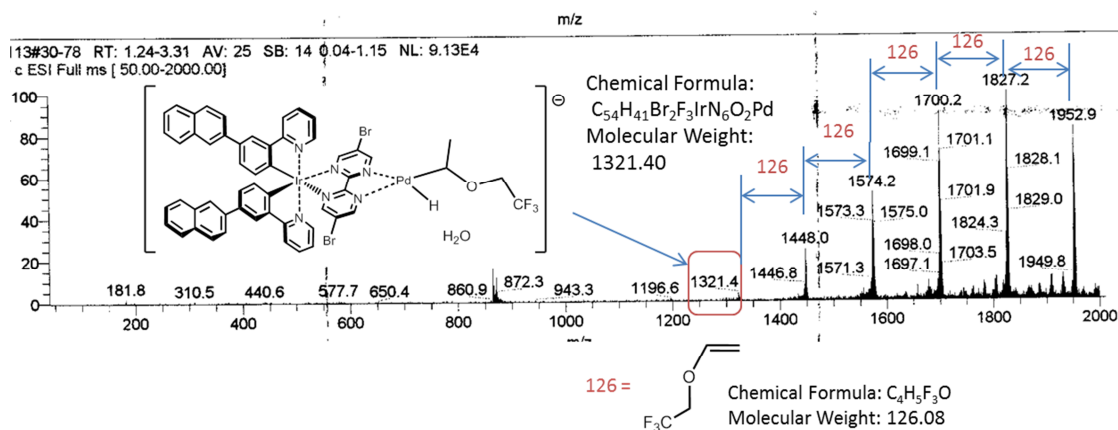

**Figure S12.** ESI-MS spectra of the reaction mixture of the catalytic copolymerization with TFEVE and styrene

## Electronic Supporting Information

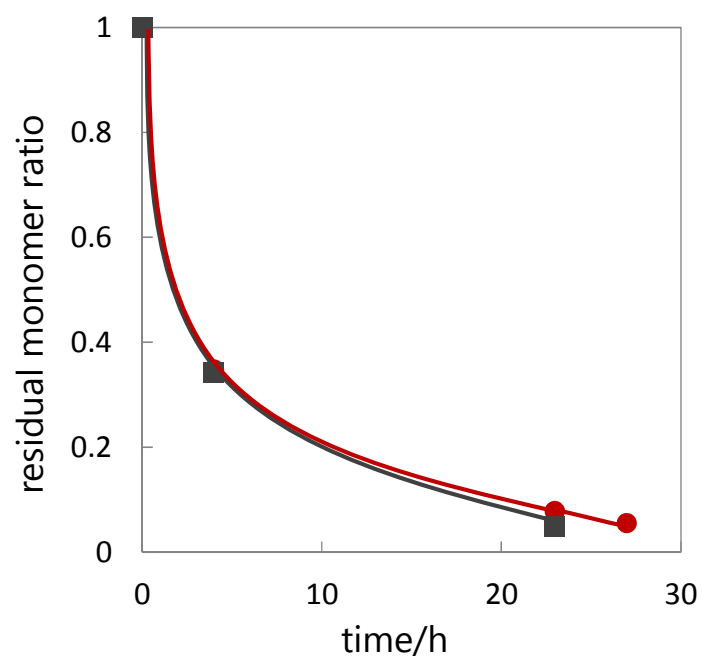

**Figure S13.** Consumption rate of TFEVE under dark (square) or irradiated (circle) condition (with 1 mol% of catalyst **1**).

## Electronic Supporting Information

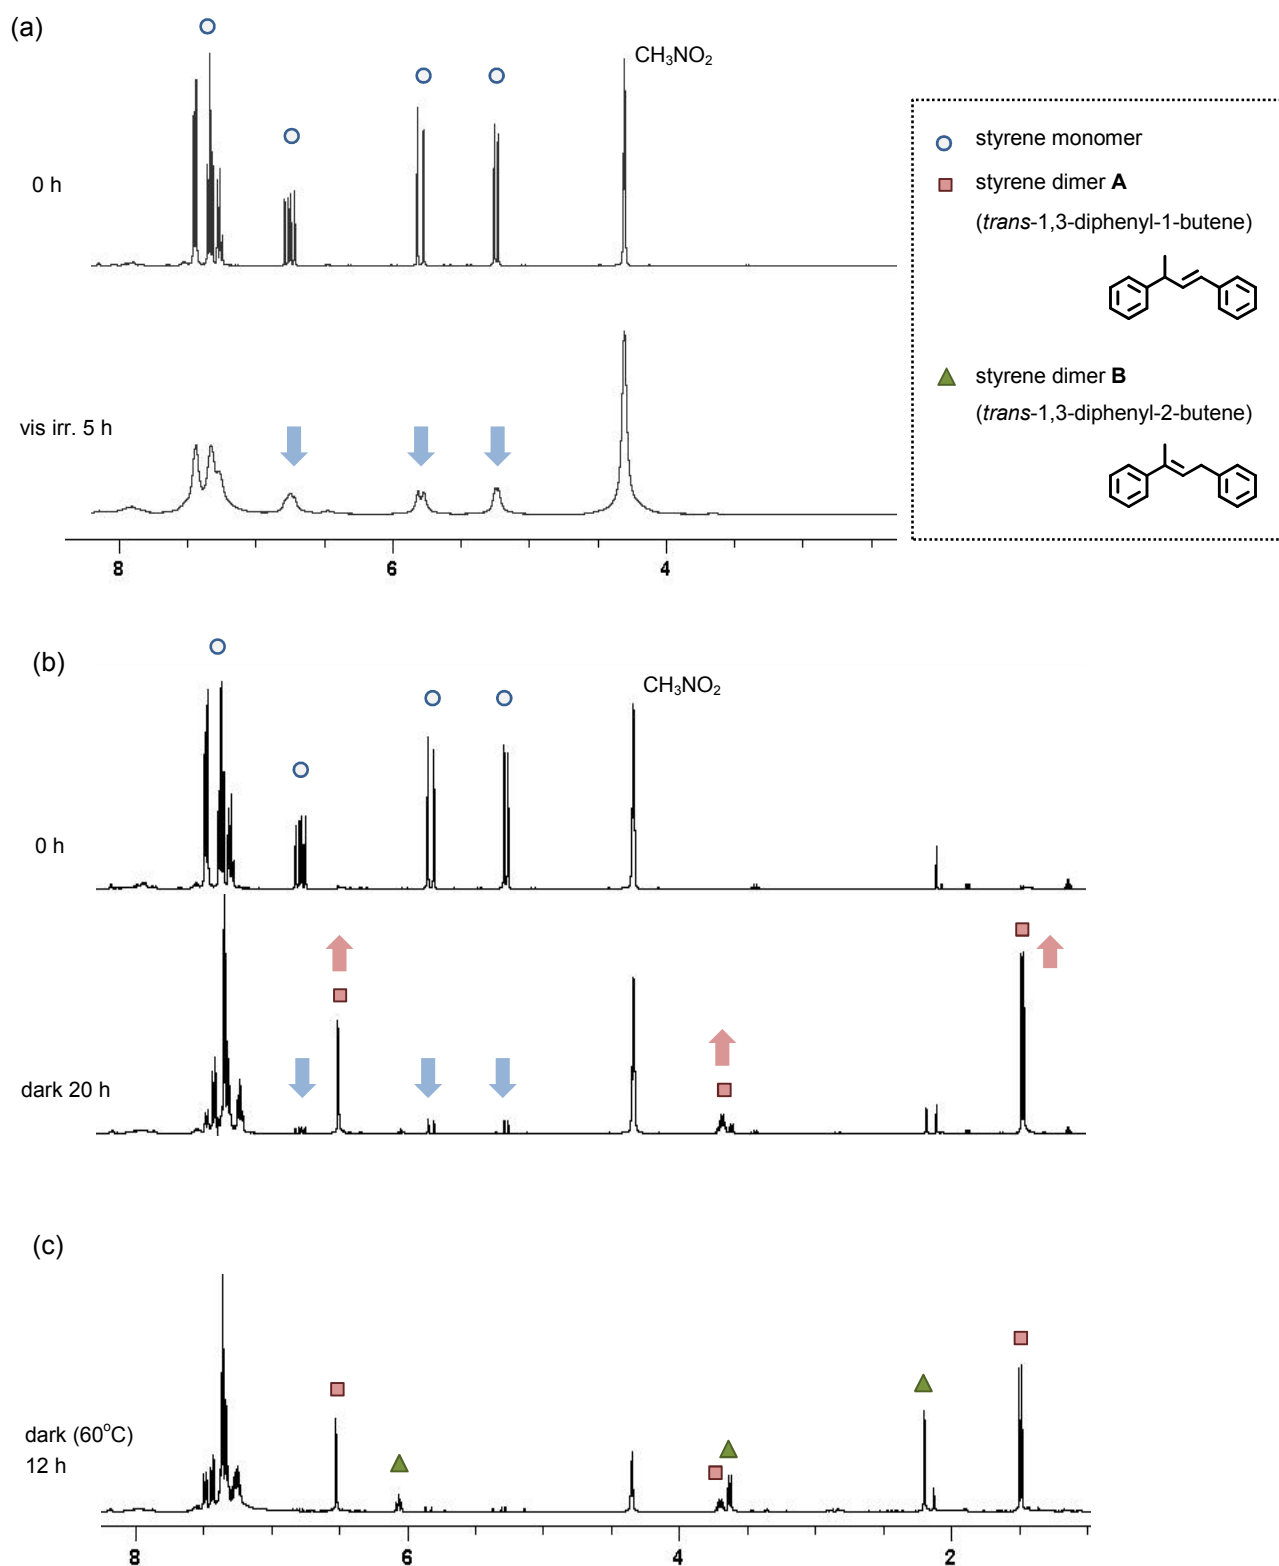

**Figure S14.** <sup>1</sup>H NMR spectra during the photocatalytic polymerization of styrene by **1** in different conditions (400 MHz, CD<sub>3</sub>NO<sub>2</sub>, r.t.) (a) visible-light irradiation ( $\lambda > 420$  nm, r.t.) (b) dark (r.t.), (c) dark (60 °C)

## Electronic Supporting Information

### References

- [1] Liu, S. -J.; Zhao, Q.; Fan, Q. -Li; Huang, W. *Eur. J. Inorg. Chem.* **2008**, 2177–2185.
- [2] Inagaki, A.; Edure, S.; Yatsuda, S.; Akita, M. *Chem. Commun.* **2005**, 5468.
